# Supplementary material for: Options for keeping the food system within environmental limits
Source: Springer Nature journal article supplement (doi:10.1038/s41586-018-0594-0), 2018-10-09
Supplement: 41586_2018_594_MOESM3_ESM.xlsx [file 41586_2018_594_MOESM3_ESM.xlsx]

## Sheet: Sheet1
Supplementary Table 1. Overview of income and population changes in the socio-economic development pathways. The pathways include a middle-of-the-road development pathway (shared socio-economic pathway 2, SSP2), a more optimistic pathway with higher income and lower population growth (SSP1), and a more pessimistic pathway with lower income and greater population growth (SSP3). Baseline conditions…
Region and parameter	Scenario (year)
	BMK (2010)	SSP2 (2050)	SSP1 (2050)	SSP3 (2050)
East Asia and Pacific
GDP	19236	80045	104096	60608
Population	2184	2261	2173	2351
GDP per capita	9	35	48	26
Europe
GDP	14628	27780	30571	21342
Population	537	577	592	498
GDP per capita	27	48	52	43
Former Soviet Union (excl. Baltic States)
GDP	2855	8984	10603	7551
Population	279	277	262	289
GDP per capita	10	32	40	26
Latin America and Caribbean
GDP	5834	19164	22838	15894
Population	585	742	674	853
GDP per capita	10	26	34	19
Middle East and North Africa
GDP	4551	18631	20566	16006
Population	457	715	646	808
GDP per capita	10	26	32	20
North America
GDP	14290	29933	33691	24753
Population	344	450	460	372
GDP per capita	41	67	73	67
South Asia
GDP	4461	32939	44250	22756
Population	1630	2373	2108	2720
GDP per capita	3	14	21	8
Sub-Saharan Africa
GDP	1705	13962	19690	9665
Population	863	1793	1564	2084
GDP per capita	2	8	13	5
World
GDP	67559	231439	286305	178575
Population	6879	9187	8479	9975
GDP per capita	10	25	34	18
Source: Calculated from IMPACT 3.1 with population and GDP growth rates from IIASA and OECD
Note: GDP and GDP per capita are in purchasing power parity (ppp)
