# Supplementary material for: Options for keeping the food system within environmental limits
Source: Springer Nature journal article supplement (doi:10.1038/s41586-018-0594-0), 2018-10-09
Supplement: 41586_2018_594_MOESM6_ESM.xlsx [file 41586_2018_594_MOESM6_ESM.xlsx]

## Sheet: Sheet1
		baseline	waste/4	waste/2	tech+	tech	flexitarian	guidelines	comb(high)	comb(med)	boundary	PB(low)	PB(high)
GHG emissions	projection	1.874
	loss&waste	1.697	0.059	0.1181
	technology	1.6618			0.037	0.1752
	diets	0.904					0.424	0.5461
	combination	0.6926							0.4252	0.7562	0.89283	0.0728059	0.12262
Cropland use	projection	1.6706
	loss&waste	1.3263	0.1148	0.2295
	technology	1.0391			0.1315	0.5001
	diets	1.4878					0.0607	0.1221
	combination	0.7019							0.2196	0.7491	1	0.16	0.16
Bluewater use	projection	1.6504
	loss&waste	1.3291	0.1071	0.2142
	technology	1.1927			0.0004	0.4573
	diets	1.4669					0.1081	0.0754
	combination	0.8215							0.1374	0.6915	1.09761	0.666405	0.666405
Nitrogen application	projection	1.5135
	loss&waste	1.1524	0.1204	0.2407
	technology	1.0325			0.4425	0.0385
	diets	1.2268					0.1441	0.1426
	combination	0.613							0.5009	0.3996	0.67	0.17	0.42
Phosphorus application	projection	1.538
	loss&waste	1.184	0.118	0.236
	technology	0.7153			0.7153	0.1075
	diets	1.2879					0.1076	0.1424
	combination	0.4531							0.6382	0.4467	0.883087	0.441543	0.0969135
