# Supplementary material for: Options for keeping the food system within environmental limits
Source: Springer Nature journal article supplement (doi:10.1038/s41586-018-0594-0), 2018-10-09
Supplement: 41586_2018_594_MOESM7_ESM.xlsx [file 41586_2018_594_MOESM7_ESM.xlsx]

## Sheet: Sheet1
Diet scenario	Tech scenario	Waste scenario	GHG emissions			Cropland use			Bluewater use			Nitrogen application			Phosphorus application
			SSP2	SSP1	SSP3	SSP2	SSP1	SSP3	SSP2	SSP1	SSP3	SSP2	SSP1	SSP3	SSP2	SSP1	SSP3
BMK	BMK	BMK	4	4	4	4	4	4	3	3	3	4	4	4	4	4	4
		waste/2	4	4	4	4	4	4	3	3	3	4	4	4	4	4	4
		waste/4	4	4	4	4	4	4	3	3	3	4	4	4	4	4	4
	Tech	BMK	4	4	4	4	4	4	3	3	3	4	4	4	4	4	4
		waste/2	4	4	4	3	3	3	2	2	2	4	4	4	4	4	4
		waste/4	4	4	4	2	2	2	2	2	2	4	4	4	4	4	4
	Tech+	BMK	4	4	4	3	3	3	3	3	3	3	3	3	2	2	2
		waste/2	4	4	4	2	2	2	2	2	2	3	3	3	2	2	2
		waste/4	4	4	4	1	1	1	2	2	2	3	3	3	2	2	2
HGD	BMK	BMK	4	4	4	4	4	4	3	3	3	4	4	4	4	4	4
		waste/2	4	4	4	4	4	4	3	3	3	4	4	4	4	4	4
		waste/4	4	4	4	4	3	4	3	3	3	3	3	3	4	4	4
	Tech	BMK	4	4	4	3	3	3	3	2	3	4	4	4	4	4	4
		waste/2	4	4	4	2	2	2	2	2	2	4	3	4	4	4	4
		waste/4	4	4	4	2	1	2	2	2	2	3	3	3	4	3	4
	Tech+	BMK	4	4	4	2	2	2	3	2	3	3	3	3	2	2	2
		waste/2	4	4	4	1	1	1	2	2	2	3	3	3	2	2	2
		waste/4	4	3	4	1	1	1	2	2	2	3	3	3	2	2	2
FLX	BMK	BMK	3	2	3	4	4	4	3	3	3	4	4	4	4	4	4
		waste/2	1	1	2	4	4	4	3	3	3	3	3	3	4	4	4
		waste/4	1	1	1	4	3	4	3	2	3	3	3	3	3	3	3
	Tech	BMK	2	1	2	3	3	3	2	2	3	4	4	4	4	4	4
		waste/2	1	1	1	2	2	2	2	2	2	3	3	3	4	4	4
		waste/4	1	1	1	1	1	2	2	2	2	3	3	3	3	2	3
	Tech+	BMK	1	1	2	2	2	2	2	2	3	3	3	3	2	2	2
		waste/2	1	1	1	1	1	1	2	2	2	3	2	3	2	2	2
		waste/4	1	1	1	1	1	1	2	2	2	2	2	2	2	1	2
NB: The source data is contained in the figure cells.
