# Supplementary material for: Options for keeping the food system within environmental limits
Source: Springer Nature journal article supplement (doi:10.1038/s41586-018-0594-0), 2018-10-09
Supplement: 41586_2018_594_MOESM8_ESM.xlsx [file 41586_2018_594_MOESM8_ESM.xlsx]

## Sheet: Sheet1
	GHG emissions	Cropland use	Bluewater use	Nitrogen application	Phosphorus application
loss&waste	5.05	11.25	10.94	11.29	11.83
technology	7.49	24.5	23.36	22.55	41.26
diets	41.47	8.96	9.37	13.44	12.54
socio-econ	5.07	4.19	5.99	2.38	2.49
check	59.07	48.89	49.65	49.67	68.13
sum	59.07	48.89	49.65	49.67	68.13
