# Supplementary material for: Options for keeping the food system within environmental limits
Source: Springer Nature journal article supplement (doi:10.1038/s41586-018-0594-0), 2018-10-09
Supplement: 41586_2018_594_MOESM9_ESM.xlsx [file 41586_2018_594_MOESM9_ESM.xlsx]

## Sheet: Sheet1
	comb(med)					comb(high)
	GHG emissions	Cropland use	Bluewater use	Nitrogen application	Phosphorus application	GHG emissions	Cropland use	Bluewater use	Nitrogen application	Phosphorus application
loss&waste	-5.68	-12.08	-12.02	-15.07	-14.11	-8.21	-17.23	-16.77	-19.04	-17.5
technology	-8.42	-26.33	-25.66	-2.41	-6.43	-9.84	-31.6	-23.88	-25.35	-40.68
diets	-26.26	-6.43	-4.23	-8.93	-8.51	-44.99	-9.15	-9.57	-15.11	-12.36
socio-econ	-40.35	-44.84	-41.9	-26.4	-29.05	-63.04	-57.98	-50.22	-59.5	-70.54
upper	-3.39	-2.31	-4.62	-2.85	-2.32	-3.39	-2.27	-3.75	-1.72	-1.34
lower	-3.56	-2.39	-4.87	-3.02	-2.49	-3.19	-2.25	-4.3	-1.6	-1.27
